# Supplementary material
Source: publisher site journal article supplement (https://www.dovepress.com/article/535671)
Supplement: Supplementary file 1 [file 535671%20Revised%20Supplementary%20Material%201.docx]

**Supplementary Material 1: Data Missing Processing Statement**

**1.Listwise Deletion**

Applicable when:

1)The data are Missing Completely at Random (MCAR)

2)The proportion of missing values is small (<5% of total cases)

**2.Imputation Methods**

Applicable when:

1)The data are MCAR or Missing at Random (MAR)

2)The missing proportion is significant

Options include: Mean/median imputation; Multiple imputation using specialized software
